# Supplementary material
Source: publisher figshare collection journal article supplement (https://acs.figshare.com/ndownloader/files/4676692)
Supplement: Supplementary file 1 [file 4676692]

  
data_y2146 
  
_audit_creation_method            SHELXL-97 
_chemical_name_systematic 
; 
 ? 
; 
_chemical_name_common             ? 
_chemical_melting_point           ? 
_chemical_formula_moiety          ? 
_chemical_formula_sum 
 'C24 H20 N2 O7' 
_chemical_formula_weight          448.42 
  
loop_ 
 _atom_type_symbol 
 _atom_type_description 
 _atom_type_scat_dispersion_real 
 _atom_type_scat_dispersion_imag 
 _atom_type_scat_source 
 'C'  'C'   0.0033   0.0016 
 'International Tables Vol C Tables 4.2.6.8 and 6.1.1.4' 
 'H'  'H'   0.0000   0.0000 
 'International Tables Vol C Tables 4.2.6.8 and 6.1.1.4' 
 'N'  'N'   0.0061   0.0033 
 'International Tables Vol C Tables 4.2.6.8 and 6.1.1.4' 
 'O'  'O'   0.0106   0.0060 
 'International Tables Vol C Tables 4.2.6.8 and 6.1.1.4' 
  
_symmetry_cell_setting            Monoclinic 
_symmetry_space_group_name_H-M    P2(1)/n 
  
loop_ 
 _symmetry_equiv_pos_as_xyz 
 'x, y, z' 
 '-x+1/2, y+1/2, -z+1/2' 
 '-x, -y, -z' 
 'x-1/2, -y-1/2, z-1/2' 
  
_cell_length_a                    10.085(1) 
_cell_length_b                    16.279(2) 
_cell_length_c                    13.421(2) 
_cell_angle_alpha                 90.00 
_cell_angle_beta                  101.56(1) 
_cell_angle_gamma                 90.00 
_cell_volume                      2158.7(5) 
_cell_formula_units_Z             4 
_cell_measurement_temperature     287(2) 
_cell_measurement_reflns_used     33 
_cell_measurement_theta_min       4.23 
_cell_measurement_theta_max       14.51 
  
_exptl_crystal_description        ? 
_exptl_crystal_colour             ? 
_exptl_crystal_size_max           0.58 
_exptl_crystal_size_mid           0.46 
_exptl_crystal_size_min           0.42 
_exptl_crystal_density_meas       ? 
_exptl_crystal_density_diffrn     1.380 
_exptl_crystal_density_method     'not measured' 
_exptl_crystal_F_000              936 
_exptl_absorpt_coefficient_mu     0.103 
_exptl_absorpt_correction_type    none 
_exptl_absorpt_correction_T_min   ? 
_exptl_absorpt_correction_T_max   ? 
_exptl_absorpt_process_details    ? 
  
_exptl_special_details 
; 
 ? 
; 
  
_diffrn_ambient_temperature       287(2) 
_diffrn_radiation_wavelength      0.71073 
_diffrn_radiation_type            MoK\a 
_diffrn_radiation_source          'normal-focus sealed tube' 
_diffrn_radiation_monochromator   graphite 
_diffrn_measurement_device_type   'Siemens P4' 
_diffrn_measurement_method        '\w scans' 
_diffrn_detector_area_resol_mean  ? 
_diffrn_standards_number          3 
_diffrn_standards_interval_count  97 
_diffrn_standards_interval_time   ? 
_diffrn_standards_decay_%         4.19 
_diffrn_reflns_number             4853 
_diffrn_reflns_av_R_equivalents   0.0125 
_diffrn_reflns_av_sigmaI/netI     0.0327 
_diffrn_reflns_limit_h_min        0 
_diffrn_reflns_limit_h_max        12 
_diffrn_reflns_limit_k_min        0 
_diffrn_reflns_limit_k_max        19 
_diffrn_reflns_limit_l_min        -16 
_diffrn_reflns_limit_l_max        15 
_diffrn_reflns_theta_min          1.99 
_diffrn_reflns_theta_max          25.50 
_reflns_number_total              4015 
_reflns_number_gt                 2752 
_reflns_threshold_expression      >2sigma(I) 
  
_computing_data_collection        'Siemens XSCANS' 
_computing_cell_refinement        'Siemens XSCANS' 
_computing_data_reduction         'Siemens SHELXTL' 
_computing_structure_solution     'SHELXS-97 (Sheldrick, 1990)' 
_computing_structure_refinement   'SHELXL-97 (Sheldrick, 1997)' 
_computing_molecular_graphics     'Siemens SHELXTL' 
_computing_publication_material   'Siemens SHELXTL' 
  
_refine_special_details 
; 
 Refinement of F^2^ against ALL reflections.  The weighted R-factor wR and 
 goodness of fit S are based on F^2^, conventional R-factors R are based 
 on F, with F set to zero for negative F^2^. The threshold expression of 
 F^2^ > 2sigma(F^2^) is used only for calculating R-factors(gt) etc. and is 
 not relevant to the choice of reflections for refinement.  R-factors based 
 on F^2^ are statistically about twice as large as those based on F, and R- 
 factors based on ALL data will be even larger. 
; 
  
_refine_ls_structure_factor_coef  Fsqd 
_refine_ls_matrix_type            full 
_refine_ls_weighting_scheme       calc 
_refine_ls_weighting_details 
 'calc w=1/[\s^2^(Fo^2^)+(0.0580P)^2^+0.0000P] where P=(Fo^2^+2Fc^2^)/3' 
_atom_sites_solution_primary      direct 
_atom_sites_solution_secondary    difmap 
_atom_sites_solution_hydrogens    geom 
_refine_ls_hydrogen_treatment     mixed 
_refine_ls_extinction_method      SHELXL 
_refine_ls_extinction_coef        0.0081(10) 
_refine_ls_extinction_expression 
 'Fc^*^=kFc[1+0.001xFc^2^\l^3^/sin(2\q)]^-1/4^' 
_refine_ls_number_reflns          4015 
_refine_ls_number_parameters      308 
_refine_ls_number_restraints      0 
_refine_ls_R_factor_all           0.0605 
_refine_ls_R_factor_gt            0.0397 
_refine_ls_wR_factor_ref          0.1048 
_refine_ls_wR_factor_gt           0.0997 
_refine_ls_goodness_of_fit_ref    1.004 
_refine_ls_restrained_S_all       1.004 
_refine_ls_shift/su_max           0.000 
_refine_ls_shift/su_mean          0.000 
  
loop_ 
 _atom_site_label 
 _atom_site_type_symbol 
 _atom_site_fract_x 
 _atom_site_fract_y 
 _atom_site_fract_z 
 _atom_site_U_iso_or_equiv 
 _atom_site_adp_type 
 _atom_site_occupancy 
 _atom_site_symmetry_multiplicity 
 _atom_site_calc_flag 
 _atom_site_refinement_flags 
 _atom_site_disorder_assembly 
 _atom_site_disorder_group 
O1 O 0.49789(12) 0.57375(7) 0.89869(9) 0.0435(3) Uani 1 1 d . . . 
O2 O 0.75122(14) 0.63891(8) 0.84636(10) 0.0451(3) Uani 1 1 d . . . 
O3 O 0.73160(11) 0.57374(7) 0.65776(8) 0.0378(3) Uani 1 1 d . . . 
O4 O 0.39237(12) 0.58343(8) 0.65623(11) 0.0541(4) Uani 1 1 d . . . 
O5 O 0.53823(15) 0.68564(8) 0.70102(12) 0.0634(4) Uani 1 1 d . . . 
O6 O 1.22616(16) 0.36160(12) 0.88995(15) 0.0879(6) Uani 1 1 d . . . 
O7 O 1.19279(15) 0.47386(13) 0.80401(14) 0.0814(5) Uani 1 1 d . . . 
N1 N 0.65120(15) 0.47021(9) 0.95083(11) 0.0379(4) Uani 1 1 d . . . 
N2 N 1.15523(17) 0.41962(13) 0.85515(14) 0.0589(5) Uani 1 1 d . . . 
C1 C 0.60141(17) 0.53644(10) 0.89492(12) 0.0339(4) Uani 1 1 d . . . 
C2 C 0.70069(16) 0.55864(10) 0.82439(12) 0.0329(4) Uani 1 1 d . . . 
C3 C 0.81190(16) 0.49702(10) 0.85697(12) 0.0325(4) Uani 1 1 d . . . 
C4 C 0.93590(17) 0.48904(11) 0.83079(13) 0.0378(4) Uani 1 1 d . . . 
H4 H 0.9627 0.5239 0.7836 0.045 Uiso 1 1 calc R . . 
C5 C 1.01956(17) 0.42683(12) 0.87766(13) 0.0419(4) Uani 1 1 d . . . 
C6 C 0.98285(19) 0.37339(12) 0.94730(15) 0.0488(5) Uani 1 1 d . . . 
H6 H 1.0411 0.3314 0.9753 0.059 Uiso 1 1 calc R . . 
C7 C 0.85918(19) 0.38262(12) 0.97519(14) 0.0460(5) Uani 1 1 d . . . 
H7 H 0.8327 0.3476 1.0224 0.055 Uiso 1 1 calc R . . 
C8 C 0.77595(17) 0.44561(10) 0.93063(12) 0.0350(4) Uani 1 1 d . . . 
C9 C 0.62931(16) 0.54839(10) 0.70957(12) 0.0326(4) Uani 1 1 d . . . 
C10 C 0.58828(16) 0.45893(10) 0.68870(12) 0.0322(4) Uani 1 1 d . . . 
C11 C 0.66958(18) 0.40811(11) 0.64305(14) 0.0424(4) Uani 1 1 d . . . 
H11 H 0.7435 0.4302 0.6208 0.051 Uiso 1 1 calc R . . 
C12 C 0.6421(2) 0.32513(12) 0.63032(16) 0.0516(5) Uani 1 1 d . . . 
H12 H 0.6969 0.2922 0.5989 0.062 Uiso 1 1 calc R . . 
C13 C 0.5350(2) 0.29104(12) 0.66353(15) 0.0510(5) Uani 1 1 d . . . 
H13 H 0.5175 0.2351 0.6558 0.061 Uiso 1 1 calc R . . 
C14 C 0.4532(2) 0.34039(11) 0.70856(15) 0.0467(5) Uani 1 1 d . . . 
H14 H 0.3798 0.3176 0.7309 0.056 Uiso 1 1 calc R . . 
C15 C 0.47887(17) 0.42343(11) 0.72102(13) 0.0377(4) Uani 1 1 d . . . 
H15 H 0.4223 0.4560 0.7514 0.045 Uiso 1 1 calc R . . 
C16 C 0.69197(19) 0.58904(13) 0.55058(13) 0.0495(5) Uani 1 1 d . . . 
H16A H 0.6109 0.6226 0.5366 0.059 Uiso 1 1 calc R . . 
H16B H 0.6733 0.5376 0.5139 0.059 Uiso 1 1 calc R . . 
C17 C 0.80638(18) 0.63272(12) 0.51828(13) 0.0415(4) Uani 1 1 d . . . 
C18 C 0.8570(2) 0.70458(13) 0.56650(17) 0.0592(6) Uani 1 1 d . . . 
H18 H 0.8223 0.7232 0.6216 0.071 Uiso 1 1 calc R . . 
C19 C 0.9570(2) 0.74920(14) 0.5354(2) 0.0703(7) Uani 1 1 d . . . 
H19 H 0.9906 0.7966 0.5701 0.084 Uiso 1 1 calc R . . 
C20 C 1.0062(2) 0.72399(17) 0.4544(2) 0.0715(7) Uani 1 1 d . . . 
H20 H 1.0705 0.7557 0.4313 0.086 Uiso 1 1 calc R . . 
C21 C 0.9628(2) 0.65243(18) 0.40601(18) 0.0760(8) Uani 1 1 d . . . 
H21 H 0.9998 0.6344 0.3517 0.091 Uiso 1 1 calc R . . 
C22 C 0.8619(2) 0.60589(16) 0.43852(16) 0.0662(6) Uani 1 1 d . . . 
H22 H 0.8327 0.5568 0.4060 0.079 Uiso 1 1 calc R . . 
C23 C 0.51358(19) 0.61338(11) 0.68822(14) 0.0409(4) Uani 1 1 d . . . 
C24 C 0.2813(2) 0.64210(15) 0.6475(2) 0.0859(9) Uani 1 1 d . . . 
H24A H 0.2775 0.6633 0.7136 0.103 Uiso 1 1 calc R . . 
H24B H 0.1975 0.6151 0.6193 0.103 Uiso 1 1 calc R . . 
H24C H 0.2958 0.6865 0.6037 0.103 Uiso 1 1 calc R . . 
H2O H 0.695(3) 0.6693(15) 0.803(2) 0.089(9) Uiso 1 1 d . . . 
H1N H 0.6064(18) 0.4508(11) 0.9984(15) 0.049(5) Uiso 1 1 d . . . 
  
loop_ 
 _atom_site_aniso_label 
 _atom_site_aniso_U_11 
 _atom_site_aniso_U_22 
 _atom_site_aniso_U_33 
 _atom_site_aniso_U_23 
 _atom_site_aniso_U_13 
 _atom_site_aniso_U_12 
O1 0.0445(7) 0.0431(7) 0.0485(8) 0.0018(6) 0.0224(6) 0.0072(6) 
O2 0.0539(8) 0.0349(7) 0.0477(8) -0.0036(6) 0.0128(7) -0.0109(7) 
O3 0.0341(6) 0.0495(7) 0.0319(6) 0.0067(5) 0.0114(5) -0.0063(6) 
O4 0.0361(7) 0.0494(8) 0.0747(10) 0.0095(7) 0.0060(7) 0.0095(6) 
O5 0.0633(9) 0.0362(8) 0.0888(11) 0.0075(7) 0.0109(8) 0.0060(7) 
O6 0.0507(10) 0.1121(15) 0.1026(14) 0.0084(11) 0.0194(9) 0.0342(10) 
O7 0.0458(9) 0.1154(14) 0.0908(13) 0.0138(11) 0.0327(9) 0.0027(9) 
N1 0.0381(8) 0.0426(9) 0.0372(8) 0.0064(7) 0.0178(7) 0.0002(7) 
N2 0.0357(9) 0.0857(14) 0.0551(11) -0.0116(10) 0.0087(8) 0.0064(10) 
C1 0.0368(10) 0.0343(9) 0.0327(9) -0.0034(7) 0.0124(7) -0.0030(8) 
C2 0.0342(9) 0.0308(9) 0.0362(9) -0.0009(7) 0.0131(7) -0.0042(7) 
C3 0.0316(9) 0.0374(10) 0.0283(8) -0.0034(7) 0.0059(7) -0.0054(7) 
C4 0.0335(9) 0.0490(11) 0.0319(9) -0.0046(8) 0.0092(8) -0.0064(8) 
C5 0.0302(9) 0.0574(12) 0.0379(10) -0.0100(9) 0.0063(8) 0.0003(9) 
C6 0.0423(11) 0.0543(12) 0.0473(12) 0.0014(9) 0.0029(9) 0.0100(9) 
C7 0.0459(11) 0.0501(11) 0.0424(10) 0.0102(9) 0.0099(9) 0.0025(9) 
C8 0.0338(9) 0.0393(10) 0.0328(9) -0.0016(7) 0.0088(7) -0.0032(8) 
C9 0.0297(9) 0.0346(9) 0.0358(9) 0.0033(7) 0.0122(7) -0.0009(7) 
C10 0.0288(9) 0.0354(9) 0.0315(9) 0.0010(7) 0.0042(7) 0.0022(7) 
C11 0.0384(10) 0.0454(11) 0.0461(11) 0.0009(9) 0.0151(8) 0.0043(9) 
C12 0.0566(13) 0.0433(11) 0.0565(13) -0.0068(9) 0.0149(10) 0.0112(10) 
C13 0.0587(13) 0.0331(10) 0.0587(13) -0.0040(9) 0.0060(10) -0.0012(9) 
C14 0.0420(11) 0.0427(11) 0.0555(12) 0.0039(9) 0.0097(9) -0.0094(9) 
C15 0.0329(9) 0.0401(10) 0.0414(10) -0.0008(8) 0.0104(8) 0.0011(8) 
C16 0.0473(11) 0.0682(13) 0.0328(10) 0.0095(9) 0.0076(8) -0.0103(10) 
C17 0.0404(10) 0.0520(11) 0.0327(10) 0.0104(8) 0.0085(8) 0.0016(9) 
C18 0.0657(14) 0.0512(12) 0.0678(14) 0.0027(11) 0.0306(12) -0.0005(11) 
C19 0.0770(16) 0.0522(14) 0.0879(18) 0.0108(12) 0.0318(14) -0.0088(12) 
C20 0.0608(15) 0.0852(18) 0.0721(16) 0.0253(14) 0.0222(13) -0.0097(13) 
C21 0.0639(15) 0.120(2) 0.0531(14) -0.0042(14) 0.0325(12) -0.0047(15) 
C22 0.0588(14) 0.0905(17) 0.0518(13) -0.0161(12) 0.0173(11) -0.0101(13) 
C23 0.0433(11) 0.0381(11) 0.0430(10) 0.0080(8) 0.0130(9) 0.0038(9) 
C24 0.0487(14) 0.0754(17) 0.131(2) 0.0222(16) 0.0112(15) 0.0290(12) 
  
_geom_special_details 
; 
 All esds (except the esd in the dihedral angle between two l.s. planes) 
 are estimated using the full covariance matrix.  The cell esds are taken 
 into account individually in the estimation of esds in distances, angles 
 and torsion angles; correlations between esds in cell parameters are only 
 used when they are defined by crystal symmetry.  An approximate (isotropic) 
 treatment of cell esds is used for estimating esds involving l.s. planes. 
; 
  
loop_ 
 _geom_bond_atom_site_label_1 
 _geom_bond_atom_site_label_2 
 _geom_bond_distance 
 _geom_bond_site_symmetry_2 
 _geom_bond_publ_flag 
O1 C1 1.2176(19) . ? 
O2 C2 1.4121(19) . ? 
O2 H2O 0.88(3) . ? 
O3 C9 1.4161(18) . ? 
O3 C16 1.435(2) . ? 
O4 C23 1.306(2) . ? 
O4 C24 1.459(2) . ? 
O5 C23 1.207(2) . ? 
O6 N2 1.220(2) . ? 
O7 N2 1.224(2) . ? 
N1 C1 1.351(2) . ? 
N1 C8 1.398(2) . ? 
N1 H1N 0.910(19) . ? 
N2 C5 1.464(2) . ? 
C1 C2 1.552(2) . ? 
C2 C3 1.503(2) . ? 
C2 C9 1.573(2) . ? 
C3 C4 1.371(2) . ? 
C3 C8 1.397(2) . ? 
C4 C5 1.386(2) . ? 
C4 H4 0.9300 . ? 
C5 C6 1.381(3) . ? 
C6 C7 1.380(3) . ? 
C6 H6 0.9300 . ? 
C7 C8 1.383(2) . ? 
C7 H7 0.9300 . ? 
C9 C10 1.524(2) . ? 
C9 C23 1.559(2) . ? 
C10 C15 1.390(2) . ? 
C10 C11 1.390(2) . ? 
C11 C12 1.383(3) . ? 
C11 H11 0.9300 . ? 
C12 C13 1.366(3) . ? 
C12 H12 0.9300 . ? 
C13 C14 1.375(3) . ? 
C13 H13 0.9300 . ? 
C14 C15 1.380(2) . ? 
C14 H14 0.9300 . ? 
C15 H15 0.9300 . ? 
C16 C17 1.492(2) . ? 
C16 H16A 0.9700 . ? 
C16 H16B 0.9700 . ? 
C17 C22 1.375(3) . ? 
C17 C18 1.384(3) . ? 
C18 C19 1.374(3) . ? 
C18 H18 0.9300 . ? 
C19 C20 1.346(3) . ? 
C19 H19 0.9300 . ? 
C20 C21 1.363(3) . ? 
C20 H20 0.9300 . ? 
C21 C22 1.406(3) . ? 
C21 H21 0.9300 . ? 
C22 H22 0.9300 . ? 
C24 H24A 0.9600 . ? 
C24 H24B 0.9600 . ? 
C24 H24C 0.9600 . ? 
  
loop_ 
 _geom_angle_atom_site_label_1 
 _geom_angle_atom_site_label_2 
 _geom_angle_atom_site_label_3 
 _geom_angle 
 _geom_angle_site_symmetry_1 
 _geom_angle_site_symmetry_3 
 _geom_angle_publ_flag 
C2 O2 H2O 102.9(17) . . ? 
C9 O3 C16 117.30(12) . . ? 
C23 O4 C24 115.79(16) . . ? 
C1 N1 C8 111.69(14) . . ? 
C1 N1 H1N 119.1(12) . . ? 
C8 N1 H1N 129.0(11) . . ? 
O6 N2 O7 123.33(19) . . ? 
O6 N2 C5 118.9(2) . . ? 
O7 N2 C5 117.71(19) . . ? 
O1 C1 N1 126.95(15) . . ? 
O1 C1 C2 124.92(15) . . ? 
N1 C1 C2 108.12(14) . . ? 
O2 C2 C3 109.87(13) . . ? 
O2 C2 C1 109.75(13) . . ? 
C3 C2 C1 101.66(13) . . ? 
O2 C2 C9 112.20(13) . . ? 
C3 C2 C9 112.48(13) . . ? 
C1 C2 C9 110.37(13) . . ? 
C4 C3 C8 120.26(16) . . ? 
C4 C3 C2 130.87(15) . . ? 
C8 C3 C2 108.74(14) . . ? 
C3 C4 C5 117.15(16) . . ? 
C3 C4 H4 121.4 . . ? 
C5 C4 H4 121.4 . . ? 
C6 C5 C4 123.12(17) . . ? 
C6 C5 N2 118.54(18) . . ? 
C4 C5 N2 118.30(18) . . ? 
C7 C6 C5 119.64(18) . . ? 
C7 C6 H6 120.2 . . ? 
C5 C6 H6 120.2 . . ? 
C6 C7 C8 117.81(18) . . ? 
C6 C7 H7 121.1 . . ? 
C8 C7 H7 121.1 . . ? 
C7 C8 C3 121.93(16) . . ? 
C7 C8 N1 128.36(16) . . ? 
C3 C8 N1 109.69(15) . . ? 
O3 C9 C10 112.69(13) . . ? 
O3 C9 C23 107.71(12) . . ? 
C10 C9 C23 116.68(13) . . ? 
O3 C9 C2 102.40(12) . . ? 
C10 C9 C2 109.59(12) . . ? 
C23 C9 C2 106.66(13) . . ? 
C15 C10 C11 117.72(16) . . ? 
C15 C10 C9 122.90(14) . . ? 
C11 C10 C9 119.15(14) . . ? 
C12 C11 C10 120.95(17) . . ? 
C12 C11 H11 119.5 . . ? 
C10 C11 H11 119.5 . . ? 
C13 C12 C11 120.59(18) . . ? 
C13 C12 H12 119.7 . . ? 
C11 C12 H12 119.7 . . ? 
C12 C13 C14 119.28(17) . . ? 
C12 C13 H13 120.4 . . ? 
C14 C13 H13 120.4 . . ? 
C13 C14 C15 120.75(18) . . ? 
C13 C14 H14 119.6 . . ? 
C15 C14 H14 119.6 . . ? 
C14 C15 C10 120.71(17) . . ? 
C14 C15 H15 119.6 . . ? 
C10 C15 H15 119.6 . . ? 
O3 C16 C17 107.32(14) . . ? 
O3 C16 H16A 110.3 . . ? 
C17 C16 H16A 110.3 . . ? 
O3 C16 H16B 110.3 . . ? 
C17 C16 H16B 110.3 . . ? 
H16A C16 H16B 108.5 . . ? 
C22 C17 C18 117.56(18) . . ? 
C22 C17 C16 122.31(19) . . ? 
C18 C17 C16 120.09(17) . . ? 
C19 C18 C17 122.0(2) . . ? 
C19 C18 H18 119.0 . . ? 
C17 C18 H18 119.0 . . ? 
C20 C19 C18 119.7(2) . . ? 
C20 C19 H19 120.1 . . ? 
C18 C19 H19 120.1 . . ? 
C19 C20 C21 120.7(2) . . ? 
C19 C20 H20 119.7 . . ? 
C21 C20 H20 119.7 . . ? 
C20 C21 C22 119.7(2) . . ? 
C20 C21 H21 120.1 . . ? 
C22 C21 H21 120.1 . . ? 
C17 C22 C21 120.2(2) . . ? 
C17 C22 H22 119.9 . . ? 
C21 C22 H22 119.9 . . ? 
O5 C23 O4 124.26(17) . . ? 
O5 C23 C9 120.66(16) . . ? 
O4 C23 C9 115.09(15) . . ? 
O4 C24 H24A 109.5 . . ? 
O4 C24 H24B 109.5 . . ? 
H24A C24 H24B 109.5 . . ? 
O4 C24 H24C 109.5 . . ? 
H24A C24 H24C 109.5 . . ? 
H24B C24 H24C 109.5 . . ? 
  
loop_ 
 _geom_torsion_atom_site_label_1 
 _geom_torsion_atom_site_label_2 
 _geom_torsion_atom_site_label_3 
 _geom_torsion_atom_site_label_4 
 _geom_torsion 
 _geom_torsion_site_symmetry_1 
 _geom_torsion_site_symmetry_2 
 _geom_torsion_site_symmetry_3 
 _geom_torsion_site_symmetry_4 
 _geom_torsion_publ_flag 
C8 N1 C1 O1 -176.85(16) . . . . ? 
C8 N1 C1 C2 2.38(18) . . . . ? 
O1 C1 C2 O2 59.9(2) . . . . ? 
N1 C1 C2 O2 -119.37(15) . . . . ? 
O1 C1 C2 C3 176.16(15) . . . . ? 
N1 C1 C2 C3 -3.09(17) . . . . ? 
O1 C1 C2 C9 -64.3(2) . . . . ? 
N1 C1 C2 C9 116.46(14) . . . . ? 
O2 C2 C3 C4 -56.7(2) . . . . ? 
C1 C2 C3 C4 -172.88(17) . . . . ? 
C9 C2 C3 C4 69.1(2) . . . . ? 
O2 C2 C3 C8 118.95(15) . . . . ? 
C1 C2 C3 C8 2.75(17) . . . . ? 
C9 C2 C3 C8 -115.29(15) . . . . ? 
C8 C3 C4 C5 2.2(2) . . . . ? 
C2 C3 C4 C5 177.38(16) . . . . ? 
C3 C4 C5 C6 0.7(3) . . . . ? 
C3 C4 C5 N2 -176.85(15) . . . . ? 
O6 N2 C5 C6 7.7(3) . . . . ? 
O7 N2 C5 C6 -170.48(19) . . . . ? 
O6 N2 C5 C4 -174.66(18) . . . . ? 
O7 N2 C5 C4 7.1(3) . . . . ? 
C4 C5 C6 C7 -2.1(3) . . . . ? 
N2 C5 C6 C7 175.45(17) . . . . ? 
C5 C6 C7 C8 0.6(3) . . . . ? 
C6 C7 C8 C3 2.3(3) . . . . ? 
C6 C7 C8 N1 -175.72(17) . . . . ? 
C4 C3 C8 C7 -3.7(3) . . . . ? 
C2 C3 C8 C7 -179.89(16) . . . . ? 
C4 C3 C8 N1 174.60(15) . . . . ? 
C2 C3 C8 N1 -1.57(18) . . . . ? 
C1 N1 C8 C7 177.62(18) . . . . ? 
C1 N1 C8 C3 -0.56(19) . . . . ? 
C16 O3 C9 C10 75.43(18) . . . . ? 
C16 O3 C9 C23 -54.68(19) . . . . ? 
C16 O3 C9 C2 -166.92(14) . . . . ? 
O2 C2 C9 O3 55.20(16) . . . . ? 
C3 C2 C9 O3 -69.28(15) . . . . ? 
C1 C2 C9 O3 177.94(13) . . . . ? 
O2 C2 C9 C10 175.03(13) . . . . ? 
C3 C2 C9 C10 50.55(17) . . . . ? 
C1 C2 C9 C10 -62.22(16) . . . . ? 
O2 C2 C9 C23 -57.82(16) . . . . ? 
C3 C2 C9 C23 177.71(13) . . . . ? 
C1 C2 C9 C23 64.93(16) . . . . ? 
O3 C9 C10 C15 -171.91(14) . . . . ? 
C23 C9 C10 C15 -46.5(2) . . . . ? 
C2 C9 C10 C15 74.78(19) . . . . ? 
O3 C9 C10 C11 13.7(2) . . . . ? 
C23 C9 C10 C11 139.13(16) . . . . ? 
C2 C9 C10 C11 -99.57(17) . . . . ? 
C15 C10 C11 C12 0.1(3) . . . . ? 
C9 C10 C11 C12 174.70(17) . . . . ? 
C10 C11 C12 C13 -0.8(3) . . . . ? 
C11 C12 C13 C14 1.0(3) . . . . ? 
C12 C13 C14 C15 -0.4(3) . . . . ? 
C13 C14 C15 C10 -0.3(3) . . . . ? 
C11 C10 C15 C14 0.5(2) . . . . ? 
C9 C10 C15 C14 -173.96(16) . . . . ? 
C9 O3 C16 C17 167.13(14) . . . . ? 
O3 C16 C17 C22 127.5(2) . . . . ? 
O3 C16 C17 C18 -55.0(2) . . . . ? 
C22 C17 C18 C19 1.4(3) . . . . ? 
C16 C17 C18 C19 -176.25(19) . . . . ? 
C17 C18 C19 C20 1.4(4) . . . . ? 
C18 C19 C20 C21 -3.3(4) . . . . ? 
C19 C20 C21 C22 2.4(4) . . . . ? 
C18 C17 C22 C21 -2.3(3) . . . . ? 
C16 C17 C22 C21 175.2(2) . . . . ? 
C20 C21 C22 C17 0.5(4) . . . . ? 
C24 O4 C23 O5 -7.2(3) . . . . ? 
C24 O4 C23 C9 172.98(17) . . . . ? 
O3 C9 C23 O5 -50.7(2) . . . . ? 
C10 C9 C23 O5 -178.58(16) . . . . ? 
C2 C9 C23 O5 58.6(2) . . . . ? 
O3 C9 C23 O4 129.11(16) . . . . ? 
C10 C9 C23 O4 1.3(2) . . . . ? 
C2 C9 C23 O4 -121.57(16) . . . . ? 
  
loop_ 
 _geom_hbond_atom_site_label_D 
 _geom_hbond_atom_site_label_H 
 _geom_hbond_atom_site_label_A 
 _geom_hbond_distance_DH 
 _geom_hbond_distance_HA 
 _geom_hbond_distance_DA 
 _geom_hbond_angle_DHA 
 _geom_hbond_site_symmetry_A 
O2 H2O O5  0.88(3) 1.89(3) 2.705(2) 153(2) . 
N1 H1N O1  0.910(19) 1.94(2) 2.8405(19) 171.4(17) 3_667 
  
_diffrn_measured_fraction_theta_max    1.000 
_diffrn_reflns_theta_full              25.50 
_diffrn_measured_fraction_theta_full   1.000 
_refine_diff_density_max    0.335 
_refine_diff_density_min   -0.175 
_refine_diff_density_rms    0.036 
  
